# Supplementary material for: Chromium Catalysts for Selective Ethylene Oligomerization Featuring Binuclear PNP Ligands
Source: MDPI journal article supplement (doi:10.3390/molecules29092158), 2024-05-06
Supplement: s1 [file s1]

# **Electronic Supplementary Information**

for

## **Chromium Catalysts for Selective Ethylene Oligomerization**

### **Featuring Binuclear PNP ligands**

Xiangyang Meng, Zhiqiang Ding, Huan Gao, Zhe Ma, Li Pan, Bin Wang\*, Yuesheng Li

Tianjin Key Laboratory of Composite & Functional Materials, School of Materials Science and Engineering, Tianjin University, Tianjin 300350, China.

## **CONTENTS**

- 1. Crystallographic details**
- 2. Spectrum of Ligands**
- 3. High Resolution Mass Spectrometry**
- 4. GC-MS spectrum of the typical oligomerization products**
- 5. Computational methodology**

## 1. Crystallographic details

A suitable crystal was selected and carried out on a Bruker D8 VENTURE dual wavelength Mo/Cu diffractometer. The crystal was kept at 193.00 K during data collection. Using Olex2 <sup>[1]</sup>, the structure was solved with the SHELXT <sup>[2]</sup> structure solution program using Intrinsic Phasing and refined with the SHELXL <sup>[3]</sup> refinement package using Least Squares minimization.

**Table S1.** Crystal data and structure refinement of ligand **2**.

| Crystal and structure data                | Ligand <b>2</b>                                                      |
|-------------------------------------------|----------------------------------------------------------------------|
| Empirical formula                         | C <sub>54</sub> H <sub>50</sub> N <sub>2</sub> P <sub>4</sub>        |
| Formula weight                            | 850.84                                                               |
| Temperature [K]                           | 193.00                                                               |
| Crystal system                            | orthorhombic                                                         |
| Space group (number)                      | <i>Pbca</i> (61)                                                     |
| <i>a</i> [Å]                              | 9.0993(10)                                                           |
| <i>b</i> [Å]                              | 19.8172(17)                                                          |
| <i>c</i> [Å]                              | 54.043(7)                                                            |
| $\alpha$ [°]                              | 90                                                                   |
| $\beta$ [°]                               | 90                                                                   |
| $\gamma$ [°]                              | 90                                                                   |
| Volume [Å <sup>3</sup> ]                  | 9745.2(18)                                                           |
| <i>Z</i>                                  | 8                                                                    |
| $\rho_{\text{calc}}$ [gcm <sup>-3</sup> ] | 1.160                                                                |
| $\mu$ [mm <sup>-1</sup> ]                 | 1.704                                                                |
| <i>F</i> (000)                            | 3584                                                                 |
| 2 $\theta$ Range(°)                       | 9.51 to 137.19 (0.83 Å)                                              |
| Index ranges                              | $-10 \leq h \leq 10$<br>$-17 \leq k \leq 23$<br>$-65 \leq l \leq 62$ |
| Reflections collected                     | 53974                                                                |
| Goodness-of-fit on F <sup>2</sup>         | 1.035                                                                |

Final R indices [I>2sigma(I)]

$R_1 = 0.0957$

Largest diff. peak and hol

0.28/−0.30

## 2. Spectrum of Ligands

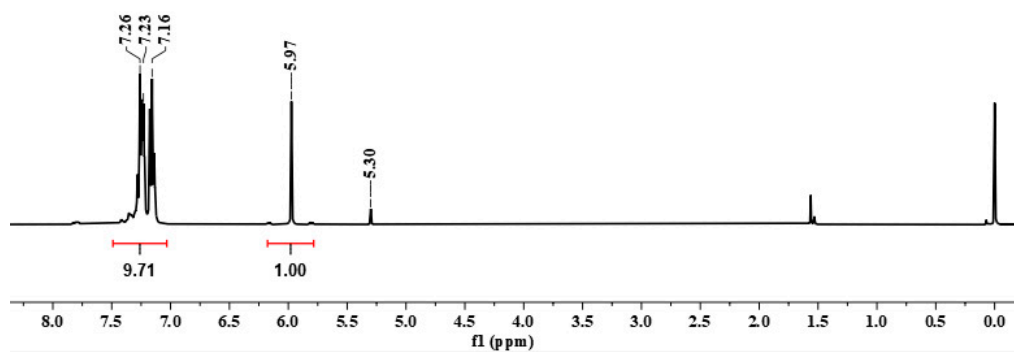

**Figure S1.** The  $^1\text{H}$  NMR spectra of ligand 1.

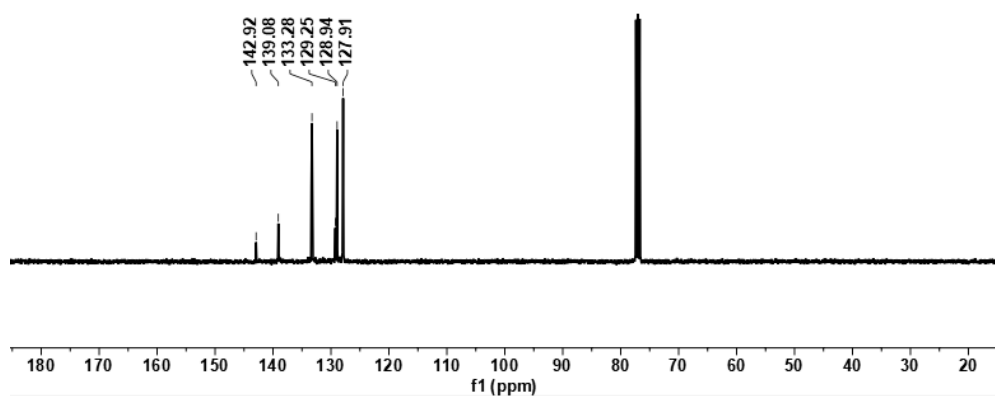

**Figure S2.** The  $^{13}\text{C}$  NMR spectra of ligand 1.

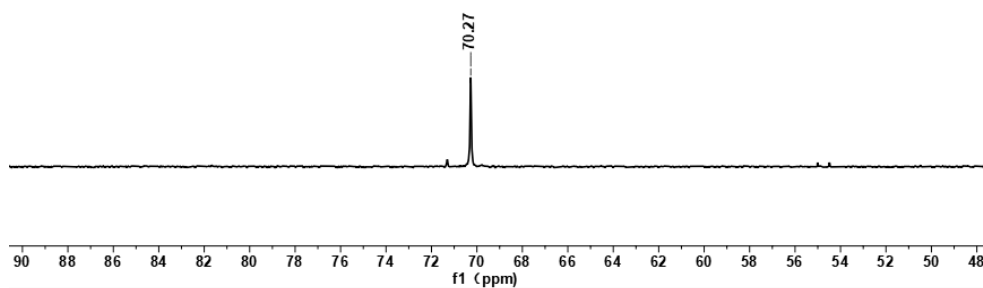

**Figure S3.** The  $^{31}\text{P}$  NMR spectra of ligand **1**.

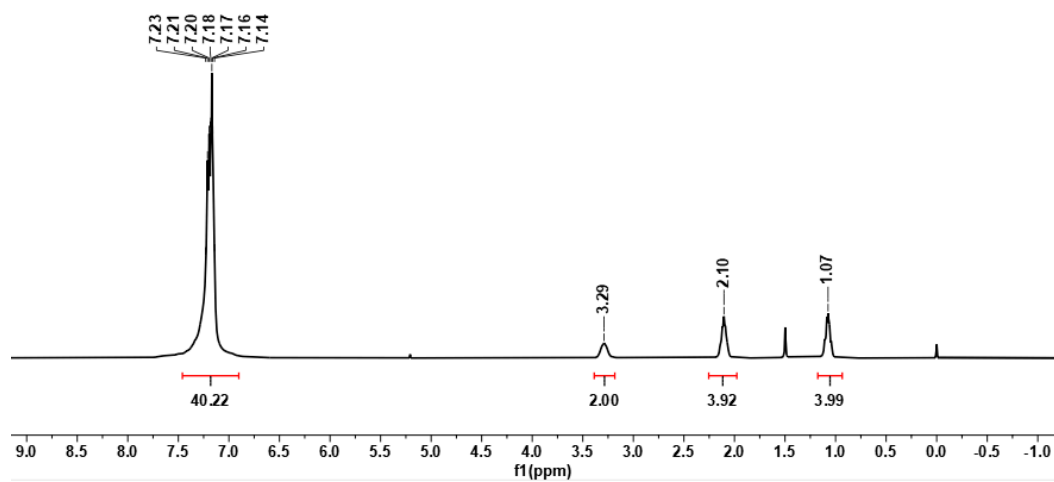

**Figure S4.** The  $^1\text{H}$  NMR spectra of ligand **2**.

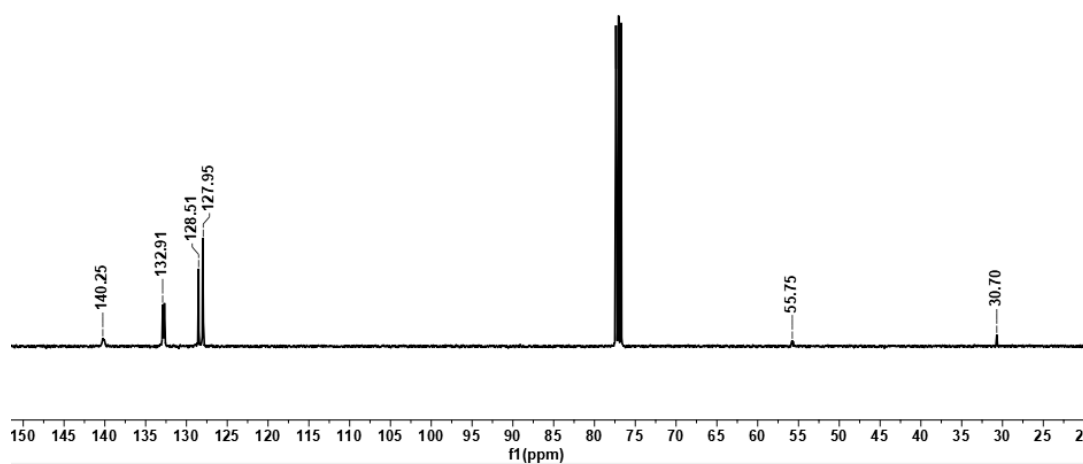

**Figure S5.** The  $^{13}\text{C}$  NMR spectra of ligand **2**.

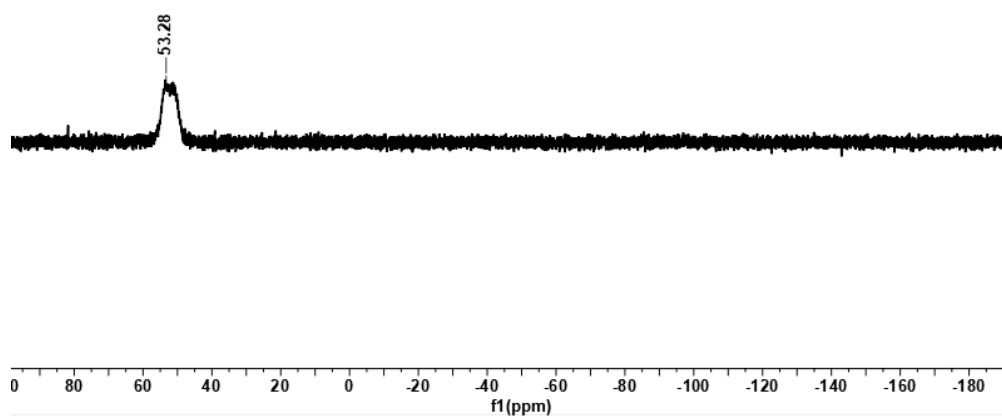

**Figure S6.** The  $^{31}\text{P}$  NMR spectra of ligand 2.

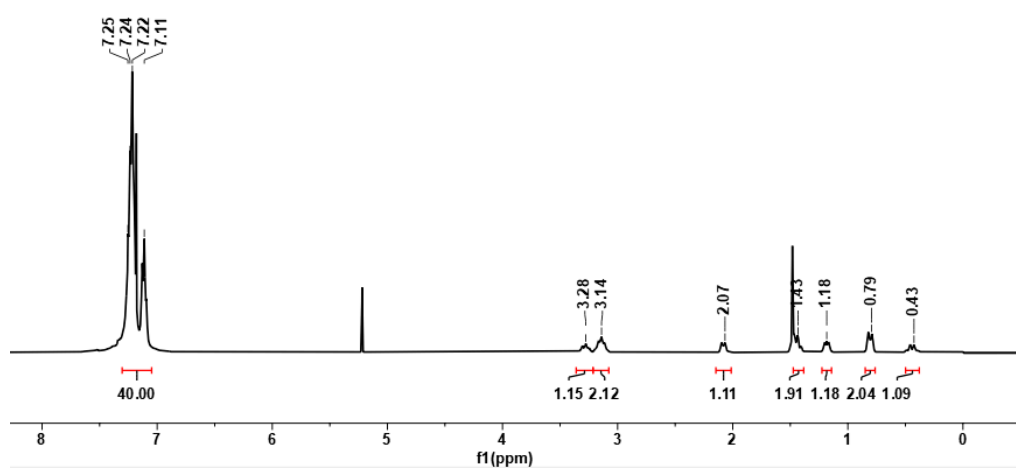

**Figure S7.** The  $^1\text{H}$  NMR spectra of ligand 3

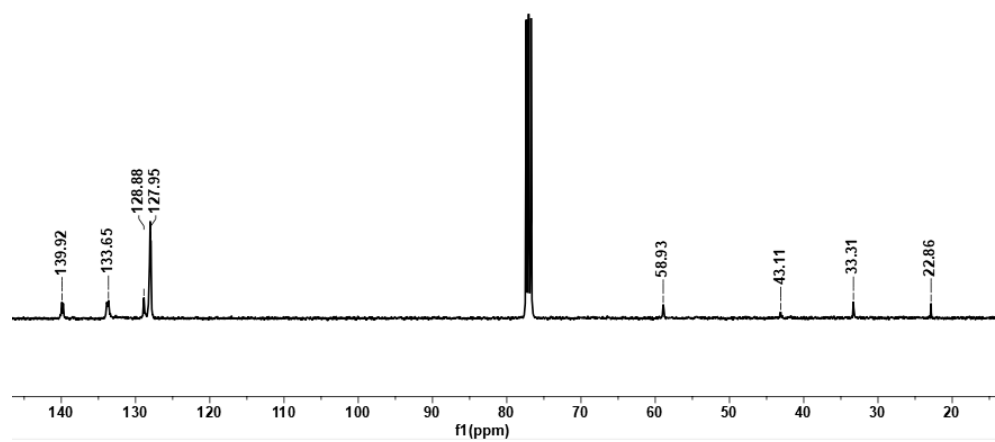

**Figure S8.** The  $^{13}\text{C}$  NMR spectra of ligand 3.

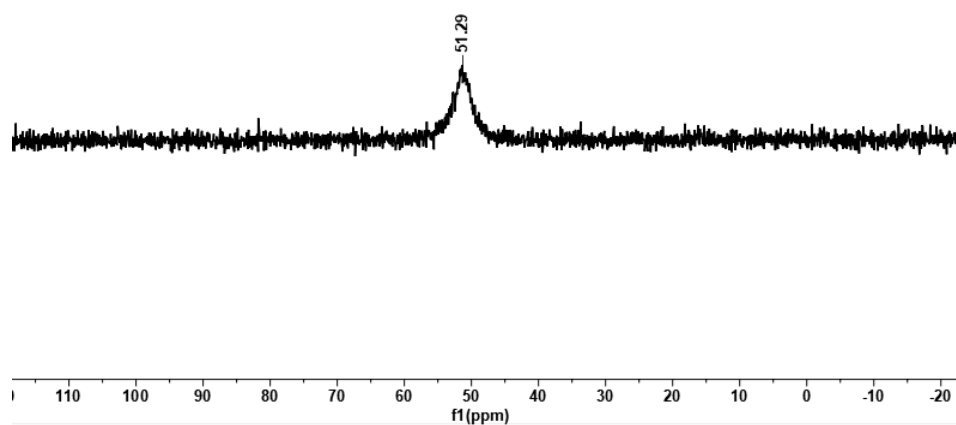

**Figure S9.** The  $^{31}\text{P}$  NMR spectra of ligand 3.

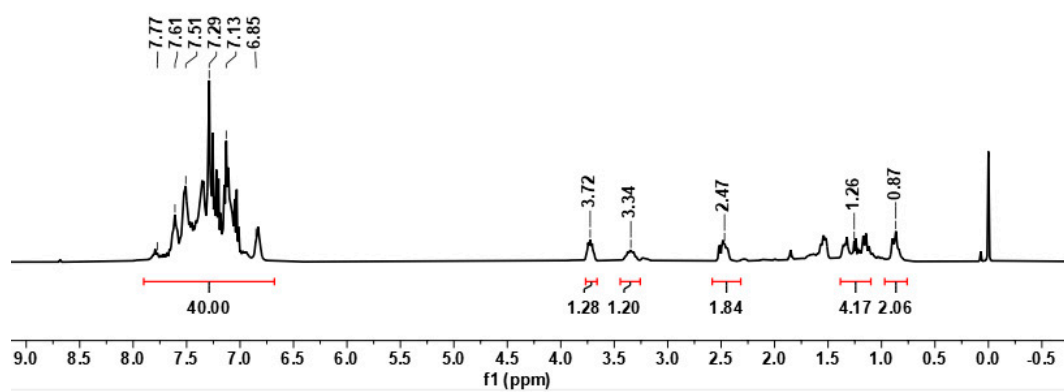

**Figure S10.** The  $^1\text{H}$  NMR spectra of ligand 4.

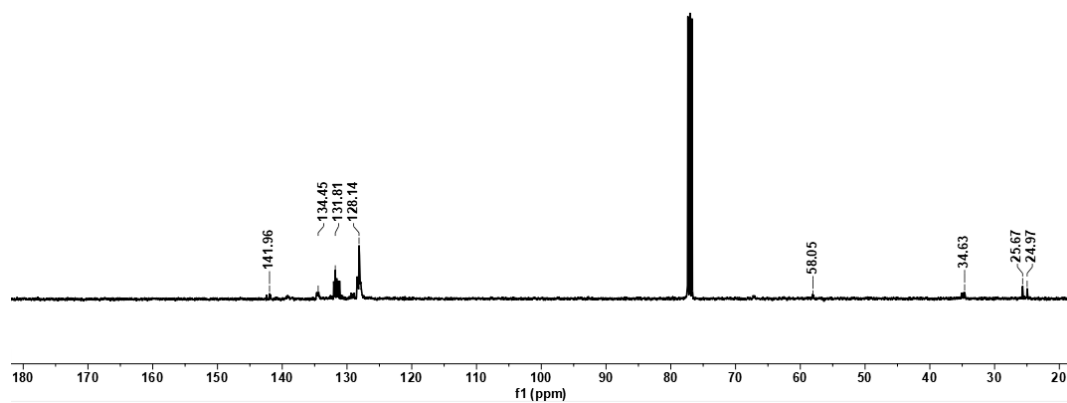

**Figure S11.** The  $^{13}\text{C}$  NMR spectra of ligand 4.

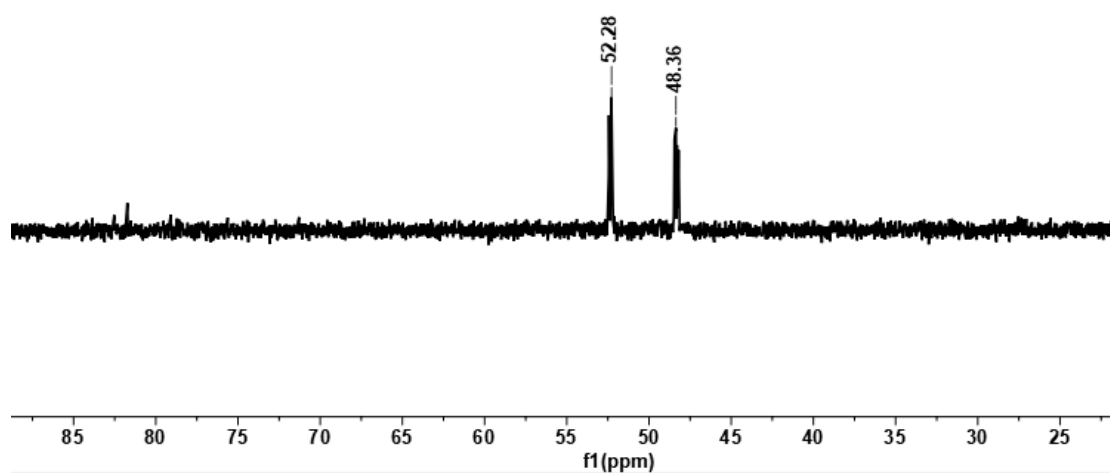

**Figure S12.** The  $^{31}\text{P}$  NMR spectra of ligand **4**.

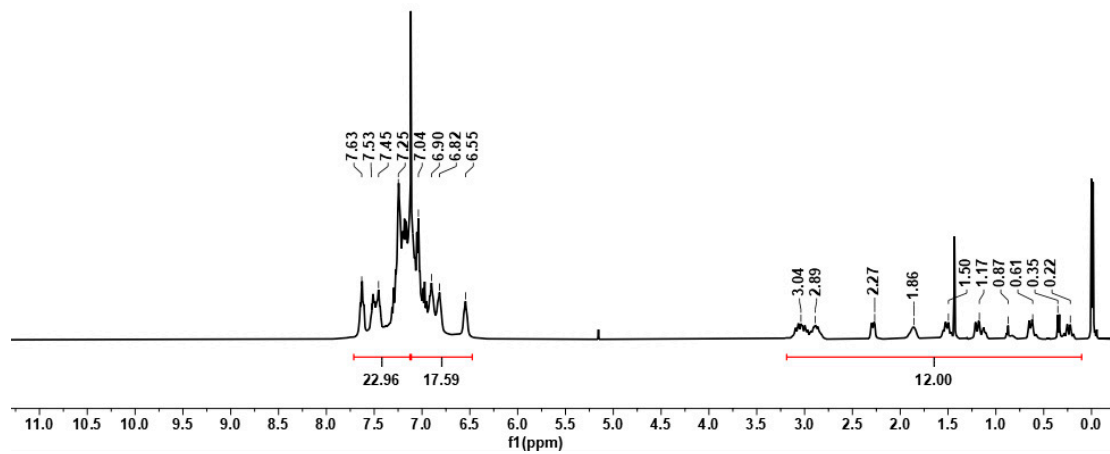

**Figure S13.** The  $^1\text{H}$  NMR spectra of ligand **5**.

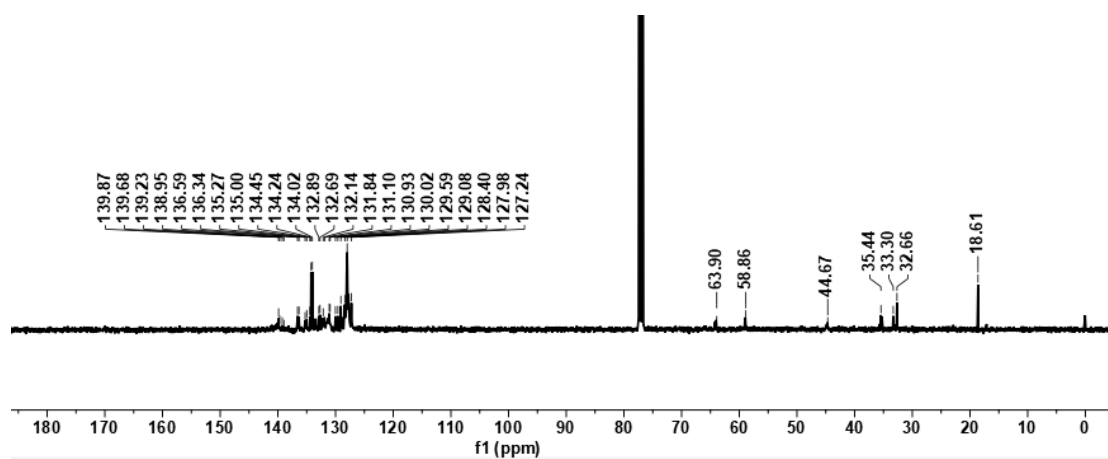

**Figure S14.** The <sup>13</sup>C NMR spectra of ligand **5**.

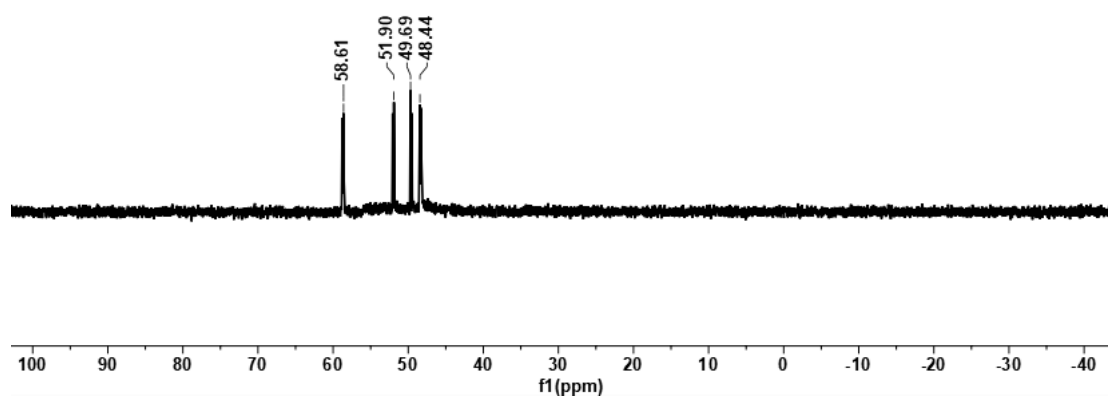

**Figure S15.** The <sup>31</sup>P NMR spectra of ligand **5**.



## 6. High Resolution Mass Spectrometry of Ligands

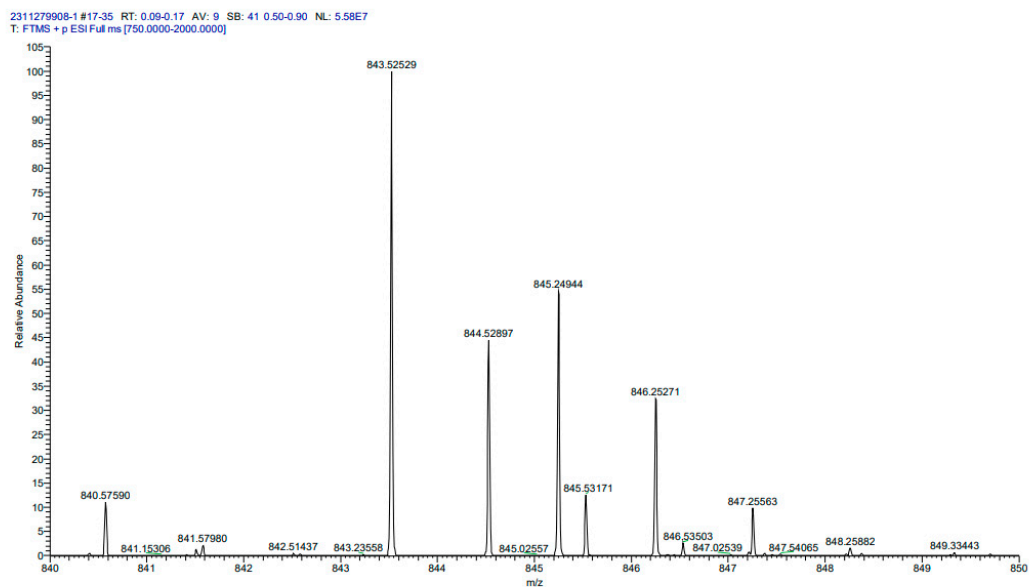

Figure S16. High Resolution Mass Spectrometry of L1

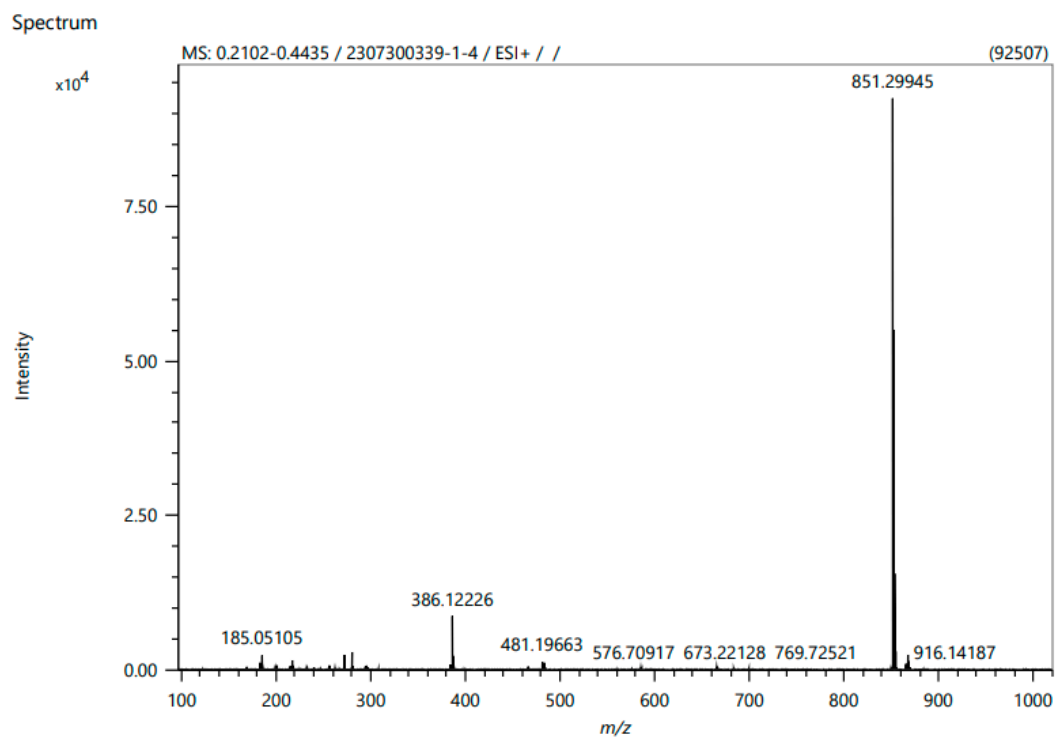

Figure S17. High Resolution Mass Spectrometry of L2

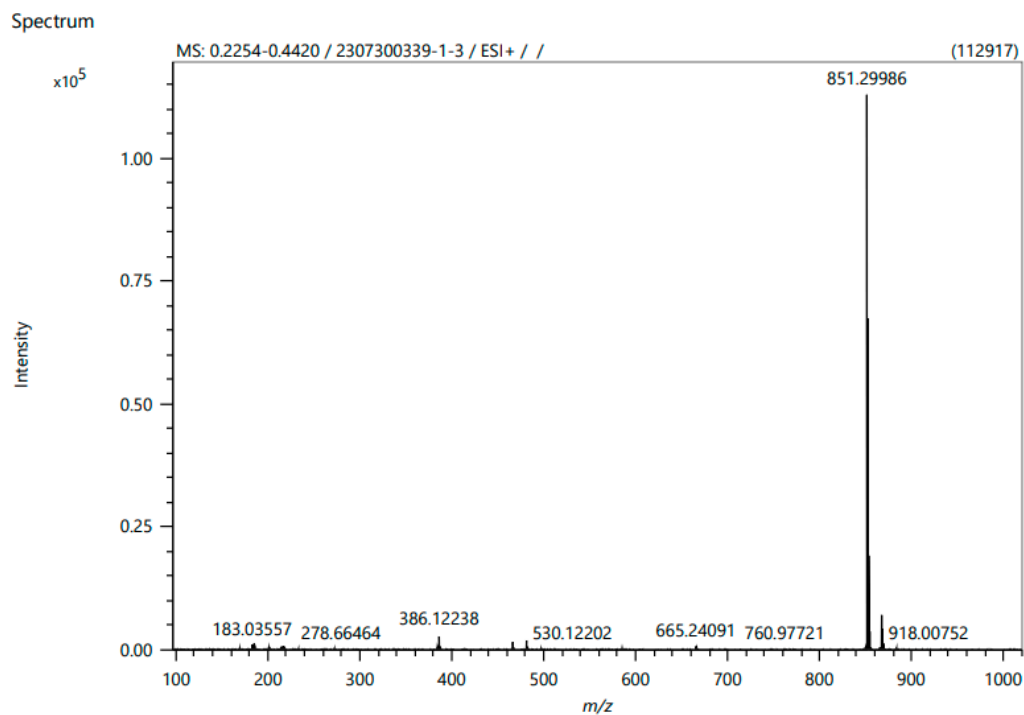

**Figure S18.** High Resolution Mass Spectrometry of **L3**

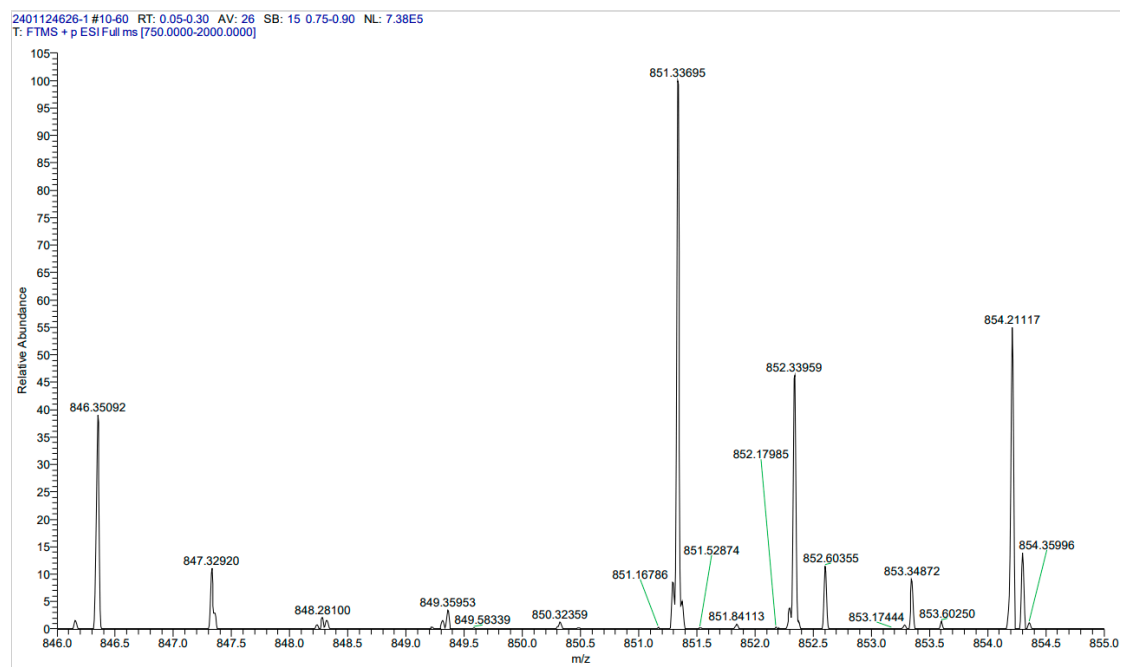

**Figure S19.** High Resolution Mass Spectrometry of **L4**

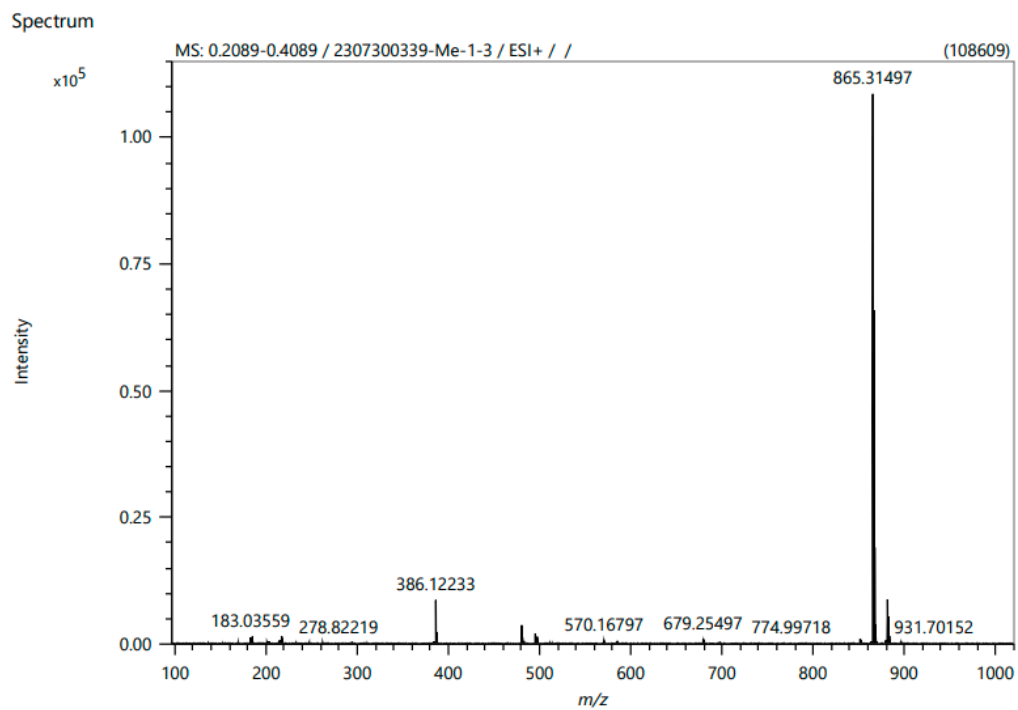

**Figure S20.** High Resolution Mass Spectrometry of **L5**

### 3. GC-MS spectrum of the typical oligomerization products

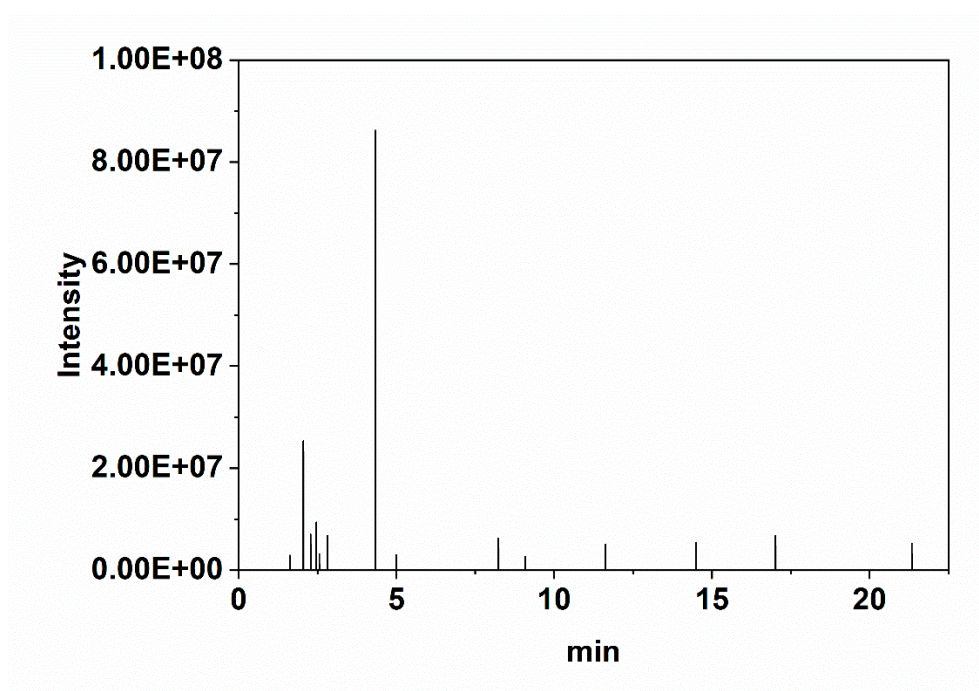

**Figure S21.** GC-MS spectrum of the oligomerization product obtained from entry 2 of Table 1.

**Table S2.** Corresponding residence time of chromatographic peak to the product.

| Residence time | Oligomerization product    |
|----------------|----------------------------|
| 1.632          | 1-Butene                   |
| 2.054          | 1-Hexene                   |
| 2.287          | Cyclopentane, methyl-      |
| 2.459          | Cyclopentane, methylene-   |
| 2.562          | Cyclohexane                |
| 2.822          | Cyclopentane, 1,2-dimethy- |
| 4.337          | 1-Octene                   |
| 4.998          | Cyclopentane, propyl-      |
| 8.241          | 1-Decene                   |
| 9.086          | Cyclopentane, pentyl-      |
| 11.626         | 1-Dodecene                 |
| 14.496         | 1-Tetradecene              |
| 17.021         | 7-Hexadecene, (Z)-         |
| 21.333         | 1-Octadecene               |

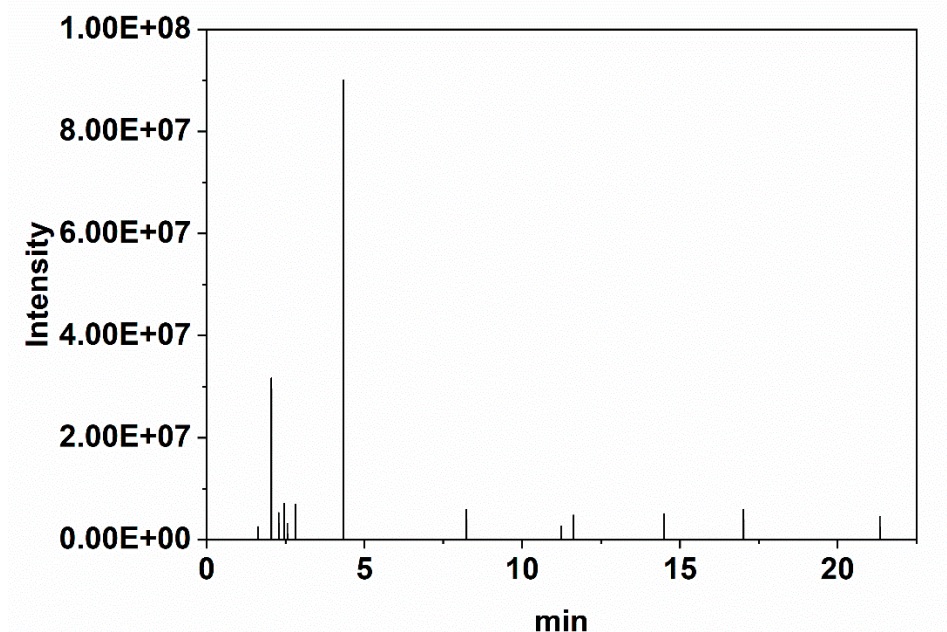

**Figure S22.** GC-MS spectrum of the oligomerization product obtained from entry 5 of Table 1.

**Table S3.** Corresponding residence time of chromatographic peak to the product.

| Residence time | Liquid substance                |
|----------------|---------------------------------|
| 1.632          | 1-Butene                        |
| 2.054          | 1-Hexene                        |
| 2.287          | Cyclopentane, methyl-           |
| 2.459          | Cyclopentane, methylene-        |
| 2.562          | Cyclohexane                     |
| 2.822          | Cyclopentane, 1,2-dimethy-      |
| 4.337          | 1-Octene                        |
| 4.998          | Cyclopentane, propyl-           |
| 8.241          | 1-Decene                        |
| 11.231         | Decane, 5-methyl-6-methylene-1- |
| 11.626         | Dodecene                        |
| 14.496         | 1-Tetradecene                   |
| 17.021         | 7-Hexadecene, (Z)-              |
| 21.333         | 1-Octadecene                    |

## Computational methodology

All the density functional theory (DFT) calculations were performed by Gaussian 09 program <sup>[4]</sup> packages with M062X functional. Geometry optimizations were carried out in the gas phase with the 6-31G (d,p) basis set.

### Optimized geometries from DFT calculations

L1

|   |          |          |          |
|---|----------|----------|----------|
| C | 0.58008  | 1.23631  | -0.38497 |
| C | -0.78153 | 1.18921  | -0.07028 |
| C | -1.38427 | 0.00851  | 0.40126  |
| C | -0.53437 | -1.10524 | 0.55055  |
| C | 0.80359  | -1.06179 | 0.19658  |
| C | 1.41361  | 0.10672  | -0.27646 |
| N | 2.80371  | 0.1548   | -0.59401 |
| N | -2.77732 | -0.07698 | 0.69605  |
| P | 3.78463  | -1.19751 | -1.21556 |
| C | 4.23573  | -2.34493 | 0.18315  |
| C | 5.38195  | -3.11108 | -0.11244 |
| C | 5.91249  | -4.01589 | 0.81066  |
| C | 5.32811  | -4.15198 | 2.0717   |
| C | 4.21504  | -3.37442 | 2.3955   |
| C | 3.67244  | -2.48333 | 1.46331  |
| C | 2.65081  | -2.18842 | -2.30811 |
| C | 2.64405  | -1.76238 | -3.65329 |
| C | 1.87097  | -2.41164 | -4.61633 |
| C | 1.10925  | -3.52529 | -4.25676 |
| C | 1.1346   | -3.9877  | -2.9345  |
| C | 1.89442  | -3.32587 | -1.96855 |

|   |          |          |          |
|---|----------|----------|----------|
| P | -4.0144  | 1.16592  | 0.53     |
| C | -3.48448 | 2.6741   | 1.48185  |
| C | -3.03471 | 3.88202  | 0.92852  |
| C | -2.71015 | 4.96458  | 1.7481   |
| C | -2.82324 | 4.85462  | 3.13579  |
| C | -3.28469 | 3.66244  | 3.69931  |
| C | -3.62519 | 2.58751  | 2.87829  |
| C | -3.98447 | 1.70363  | -1.23154 |
| C | -4.88046 | 2.72732  | -1.60086 |
| C | -5.03977 | 3.08955  | -2.93765 |
| C | -4.32125 | 2.42422  | -3.93526 |
| C | -3.44089 | 1.39924  | -3.58155 |
| C | -3.27119 | 1.04168  | -2.24202 |
| P | -3.68986 | -1.43796 | 1.45892  |
| C | -4.08569 | -2.52869 | 0.01451  |
| C | -5.32629 | -3.18514 | 0.0542   |
| C | -5.72759 | -4.02656 | -0.98731 |
| C | -4.89893 | -4.21083 | -2.09365 |
| C | -3.66924 | -3.54886 | -2.15558 |
| C | -3.26483 | -2.71308 | -1.11132 |
| C | -2.99456 | -1.92266 | 3.46172  |
| C | -2.45149 | -0.87085 | 4.20541  |
| C | -1.27031 | -1.03732 | 4.93867  |
| C | -0.64133 | -2.27745 | 4.95595  |
| C | -1.19717 | -3.34995 | 4.24402  |
| C | -2.32659 | -3.1614  | 3.45308  |
| P | 3.88541  | 1.54573  | -0.48639 |
| C | 3.17557  | 2.90949  | -1.53847 |
| C | 3.15428  | 2.69055  | -2.92723 |
| C | 2.76479  | 3.70343  | -3.80504 |

|   |          |          |          |
|---|----------|----------|----------|
| C | 2.41431  | 4.96518  | -3.31266 |
| C | 2.44679  | 5.19921  | -1.93755 |
| C | 2.81891  | 4.17877  | -1.05542 |
| C | 3.72921  | 2.19432  | 1.23788  |
| C | 2.83855  | 1.7294   | 2.22046  |
| C | 2.88857  | 2.23572  | 3.52148  |
| C | 3.82197  | 3.21481  | 3.86464  |
| C | 4.72322  | 3.67782  | 2.89923  |
| C | 4.68423  | 3.16326  | 1.60389  |
| H | 0.98102  | 2.1838   | -0.72852 |
| H | -1.352   | 2.10174  | -0.19011 |
| H | -0.94838 | -2.01479 | 1.04901  |
| H | 1.38816  | -1.95518 | 0.34798  |
| H | 5.86589  | -2.98987 | -1.07925 |
| H | 6.79184  | -4.60054 | 0.55011  |
| H | 5.7475   | -4.84427 | 2.79997  |
| H | 3.76268  | -3.45608 | 3.38067  |
| H | 2.82308  | -1.87938 | 1.75996  |
| H | 3.26019  | -0.91363 | -3.94682 |
| H | 1.87734  | -2.05781 | -5.64798 |
| H | 0.51257  | -4.0416  | -5.00396 |
| H | 0.56258  | -4.87094 | -2.65658 |
| H | 1.92851  | -3.7275  | -0.95456 |
| H | -2.95417 | 3.98553  | -0.15009 |
| H | -2.36432 | 5.89268  | 1.30058  |
| H | -2.56342 | 5.69599  | 3.77246  |
| H | -3.39022 | 3.57379  | 4.77742  |
| H | -4.00856 | 1.6726   | 3.32239  |
| H | -5.4648  | 3.2402   | -0.83894 |
| H | -5.73409 | 3.88473  | -3.20023 |



|   |          |          |          |
|---|----------|----------|----------|
| H | -4.45142 | 2.69979  | -4.97834 |
| H | -2.87823 | 0.87392  | -4.34946 |
| H | -2.58544 | 0.24118  | -1.98367 |
| H | -5.98602 | -3.02693 | 0.90375  |
| H | -6.69169 | -4.52716 | -0.93925 |
| H | -5.21211 | -4.85892 | -2.90919 |
| H | -3.02276 | -3.68162 | -3.01887 |
| H | -2.3108  | -2.19819 | -1.17644 |
| H | -2.95149 | 0.09601  | 4.20515  |
| H | -0.85899 | -0.20184 | 5.49802  |
| H | 0.26383  | -2.42542 | 5.53987  |
| H | -0.73402 | -4.33295 | 4.30559  |
| H | -2.78552 | -4.02016 | 2.97295  |
| H | 3.44699  | 1.71969  | -3.32169 |
| H | 2.74626  | 3.5134   | -4.87461 |
| H | 2.12458  | 5.76159  | -3.99636 |
| H | 2.17774  | 6.17818  | -1.54632 |
| H | 2.83443  | 4.374    | 0.01209  |
| H | 2.10427  | 0.96971  | 1.97852  |
| H | 2.18801  | 1.86246  | 4.26731  |
| H | 3.85407  | 3.60766  | 4.87669  |
| H | 5.46552  | 4.42982  | 3.15692  |
| H | 5.40881  | 3.51371  | 0.86907  |

## L2

|   |          |          |         |
|---|----------|----------|---------|
| C | -0.41949 | 0.41795  | -0.3509 |
| C | 1.03167  | 0.15542  | -0.7564 |
| C | 2.01761  | 0.50164  | 0.36758 |
| C | 1.63155  | -0.14104 | 1.70913 |
| C | 0.17832  | 0.19029  | 2.06504 |

|   |          |          |          |
|---|----------|----------|----------|
| C | -0.73829 | -0.32012 | 0.95218  |
| N | -2.1794  | -0.30943 | 1.33213  |
| N | 3.45054  | 0.29658  | -0.01232 |
| P | -2.33926 | -1.05717 | 2.93066  |
| C | -1.40557 | -0.54292 | 4.42854  |
| C | -2.15421 | -0.25508 | 5.57214  |
| C | -1.51996 | 0.1172   | 6.75495  |
| C | -0.13301 | 0.21753  | 6.79644  |
| C | 0.62235  | -0.08399 | 5.66333  |
| C | -0.0104  | -0.48203 | 4.49139  |
| C | -1.32322 | -2.59055 | 2.69169  |
| C | -1.73753 | -3.72473 | 3.40075  |
| C | -1.04149 | -4.92431 | 3.2945   |
| C | 0.07669  | -5.01192 | 2.46563  |
| C | 0.48589  | -3.89495 | 1.74408  |
| C | -0.2147  | -2.69472 | 1.85048  |
| P | -3.25264 | -0.43682 | -0.02266 |
| C | -3.04841 | 1.15987  | -0.9227  |
| C | -3.51639 | 2.29473  | -0.24696 |
| C | -3.45181 | 3.55245  | -0.83662 |
| C | -2.94652 | 3.68973  | -2.12751 |
| C | -2.49467 | 2.56533  | -2.81252 |
| C | -2.53516 | 1.30916  | -2.21342 |
| C | -2.48746 | -1.67591 | -1.14598 |
| C | -3.05711 | -1.87071 | -2.41184 |
| C | -2.60353 | -2.88614 | -3.24706 |
| C | -1.59337 | -3.74514 | -2.81937 |
| C | -1.05042 | -3.58698 | -1.54771 |
| C | -1.50048 | -2.56409 | -0.71662 |
| P | 4.43296  | 0.9166   | 1.33199  |

|   |          |          |          |
|---|----------|----------|----------|
| C | 4.13315  | -0.22047 | 2.7506   |
| C | 3.23108  | 0.0137   | 3.79466  |
| C | 3.08501  | -0.91343 | 4.81987  |
| C | 3.83145  | -2.09047 | 4.81414  |
| C | 4.74087  | -2.32884 | 3.78854  |
| C | 4.90245  | -1.38997 | 2.77322  |
| C | 3.48999  | 2.42048  | 1.82274  |
| C | 2.52939  | 3.00428  | 0.99521  |
| C | 1.93405  | 4.21533  | 1.34298  |
| C | 2.29781  | 4.86171  | 2.51984  |
| C | 3.27082  | 4.2974   | 3.34336  |
| C | 3.87088  | 3.09394  | 2.99083  |
| P | 3.94521  | 0.7902   | -1.66186 |
| C | 4.3618   | -0.71438 | -2.63582 |
| C | 5.48116  | -0.63605 | -3.46747 |
| C | 5.88387  | -1.74039 | -4.215   |
| C | 5.17847  | -2.93709 | -4.12531 |
| C | 4.06289  | -3.02441 | -3.29437 |
| C | 3.65588  | -1.91797 | -2.55563 |
| C | 2.90344  | 1.36134  | -3.08349 |
| C | 2.97226  | 2.71879  | -3.41986 |
| C | 2.14818  | 3.25607  | -4.40677 |
| C | 1.27978  | 2.42115  | -5.10534 |
| C | 1.24162  | 1.0579   | -4.81871 |
| C | 2.04271  | 0.53249  | -3.81024 |
| H | -1.09783 | 0.08099  | -1.14346 |
| H | -0.58779 | 1.4934   | -0.2002  |
| H | 1.13199  | -0.90254 | -1.02117 |
| H | 1.30038  | 0.73346  | -1.64877 |
| H | 1.91613  | 1.58558  | 0.53603  |

|   |          |          |          |
|---|----------|----------|----------|
| H | 1.72839  | -1.22717 | 1.67651  |
| H | 2.31247  | 0.21894  | 2.48781  |
| H | -0.09115 | -0.27538 | 3.01996  |
| H | 0.04139  | 1.27292  | 2.18469  |
| H | -0.47199 | -1.3778  | 0.79847  |
| H | -3.23942 | -0.29397 | 5.52523  |
| H | -2.11185 | 0.34811  | 7.6353   |
| H | 0.36295  | 0.52133  | 7.71337  |
| H | 1.70572  | -0.02116 | 5.69635  |
| H | 0.58097  | -0.75336 | 3.62365  |
| H | -2.61167 | -3.66456 | 4.04613  |
| H | -1.37173 | -5.79233 | 3.85666  |
| H | 0.62032  | -5.94789 | 2.38142  |
| H | 1.3487   | -3.95492 | 1.08734  |
| H | 0.09356  | -1.83516 | 1.26363  |
| H | -3.93051 | 2.19008  | 0.75385  |
| H | -3.80875 | 4.42229  | -0.29394 |
| H | -2.90621 | 4.66786  | -2.59665 |
| H | -2.08177 | 2.66668  | -3.81172 |
| H | -2.12311 | 0.454    | -2.73952 |
| H | -3.8622  | -1.2211  | -2.74833 |
| H | -3.04579 | -3.01283 | -4.23029 |
| H | -1.24276 | -4.54087 | -3.46884 |
| H | -0.27524 | -4.26248 | -1.19878 |
| H | -1.08166 | -2.4407  | 0.27669  |
| H | 2.61722  | 0.90853  | 3.79025  |
| H | 2.36902  | -0.72613 | 5.61414  |
| H | 3.70695  | -2.81728 | 5.61107  |
| H | 5.33237  | -3.23882 | 3.78233  |
| H | 5.62354  | -1.57088 | 1.97936  |

|   |         |          |          |
|---|---------|----------|----------|
| H | 2.24739 | 2.49359  | 0.07857  |
| H | 1.18469 | 4.65337  | 0.69067  |
| H | 1.83354 | 5.80446  | 2.79134  |
| H | 3.56521 | 4.79838  | 4.26032  |
| H | 4.63539 | 2.6657   | 3.63586  |
| H | 6.05727 | 0.28547  | -3.50638 |
| H | 6.76003 | -1.67123 | -4.85241 |
| H | 5.49937 | -3.80239 | -4.69722 |
| H | 3.51426 | -3.95812 | -3.21217 |
| H | 2.80694 | -1.98937 | -1.88404 |
| H | 3.66647 | 3.36631  | -2.88963 |
| H | 2.17419 | 4.32003  | -4.62873 |
| H | 0.64103 | 2.83551  | -5.8791  |
| H | 0.5784  | 0.40368  | -5.37644 |
| H | 1.99189 | -0.52706 | -3.58231 |

### L3

|   |          |          |          |
|---|----------|----------|----------|
| C | -0.8463  | 0.94181  | -4.99823 |
| C | 0.52954  | 0.34186  | -5.33731 |
| C | 1.48881  | 0.44133  | -4.13818 |
| C | 0.87551  | -0.27908 | -2.92853 |
| C | -0.50617 | 0.30219  | -2.57646 |
| C | -1.47374 | 0.25508  | -3.77505 |
| N | -2.85877 | 0.7321   | -3.45218 |
| N | 1.93781  | -0.73435 | -1.32861 |
| P | -4.18763 | -0.36699 | -3.10296 |
| C | -3.8443  | -1.11251 | -1.43728 |
| C | -3.21645 | -0.36946 | -0.42555 |
| C | -3.13768 | -0.85569 | 0.88041  |
| C | -3.70012 | -2.08982 | 1.20686  |

|   |          |          |          |
|---|----------|----------|----------|
| C | -4.3501  | -2.82945 | 0.21735  |
| C | -4.42715 | -2.3438  | -1.08776 |
| C | -3.89436 | -1.80327 | -4.24415 |
| C | -4.62656 | -1.79871 | -5.44372 |
| C | -4.49708 | -2.8341  | -6.37038 |
| C | -3.6435  | -3.90536 | -6.10348 |
| C | -2.91787 | -3.93254 | -4.91056 |
| C | -3.03911 | -2.88944 | -3.99109 |
| P | -3.47437 | 2.3729   | -3.37388 |
| C | -2.1274  | 3.4211   | -2.63325 |
| C | -2.16331 | 3.55347  | -1.23378 |
| C | -1.23428 | 4.34575  | -0.55888 |
| C | -0.26109 | 5.0442   | -1.27628 |
| C | -0.22589 | 4.94481  | -2.66916 |
| C | -1.15073 | 4.14217  | -3.33963 |
| C | -3.59187 | 2.99464  | -5.11681 |
| C | -3.6991  | 4.37583  | -5.36019 |
| C | -3.99399 | 4.85903  | -6.63497 |
| C | -4.20604 | 3.97298  | -7.69249 |
| C | -4.13074 | 2.5995   | -7.45954 |
| C | -3.83481 | 2.11628  | -6.18433 |
| P | 2.24242  | -2.28997 | -0.57362 |
| C | 1.82962  | -3.58888 | -1.83756 |
| C | 0.57413  | -4.18719 | -2.03674 |
| C | 0.39779  | -5.16942 | -3.01104 |
| C | 1.47403  | -5.57423 | -3.80443 |
| C | 2.73007  | -4.99946 | -3.6109  |
| C | 2.90528  | -4.02247 | -2.62952 |
| C | 0.94607  | -2.56051 | 0.7277   |
| C | 0.44292  | -1.48616 | 1.47877  |

|   |          |          |          |
|---|----------|----------|----------|
| C | -0.36795 | -1.70378 | 2.59303  |
| C | -0.67957 | -3.00266 | 2.99602  |
| C | -0.16101 | -4.08232 | 2.27991  |
| C | 0.64699  | -3.8646  | 1.1638   |
| P | 3.15482  | 0.41617  | -0.79646 |
| C | 3.73525  | 1.1944   | -2.37597 |
| C | 4.102    | 2.54872  | -2.45253 |
| C | 4.698    | 3.06584  | -3.60461 |
| C | 4.94533  | 2.24018  | -4.7017  |
| C | 4.60794  | 0.88716  | -4.63131 |
| C | 4.02017  | 0.36942  | -3.47789 |
| C | 2.20078  | 1.80101  | 0.00621  |
| C | 2.29768  | 1.86272  | 1.40704  |
| C | 1.60262  | 2.82838  | 2.13807  |
| C | 0.79862  | 3.75646  | 1.47675  |
| C | 0.70031  | 3.71861  | 0.08388  |
| C | 1.39767  | 2.75448  | -0.64417 |
| H | -1.50478 | 0.83874  | -5.86374 |
| H | -0.73593 | 2.01344  | -4.81144 |
| H | 0.39926  | -0.70042 | -5.63273 |
| H | 0.95106  | 0.86596  | -6.19918 |
| H | 1.6505   | 1.47084  | -3.89555 |
| H | 0.78735  | -1.35133 | -3.14319 |
| H | -0.92904 | -0.25885 | -1.73953 |
| H | -0.38879 | 1.33773  | -2.23883 |
| H | -1.59053 | -0.79943 | -4.04716 |
| H | -2.78155 | 0.59527  | -0.66296 |
| H | -2.63615 | -0.26675 | 1.64345  |
| H | -3.63901 | -2.46884 | 2.22277  |
| H | -4.79848 | -3.78881 | 0.46042  |

|   |          |          |          |
|---|----------|----------|----------|
| H | -4.94383 | -2.93216 | -1.84044 |
| H | -5.31393 | -0.98058 | -5.64293 |
| H | -5.07358 | -2.81196 | -7.29069 |
| H | -3.55283 | -4.72081 | -6.81551 |
| H | -2.26008 | -4.76936 | -4.69187 |
| H | -2.48    | -2.93046 | -3.06163 |
| H | -2.93902 | 3.04034  | -0.67116 |
| H | -1.28286 | 4.43268  | 0.52284  |
| H | 0.45366  | 5.67582  | -0.75635 |
| H | 0.52266  | 5.48966  | -3.23754 |
| H | -1.11909 | 4.09394  | -4.4226  |
| H | -3.55052 | 5.08347  | -4.54956 |
| H | -4.05915 | 5.93087  | -6.80058 |
| H | -4.43599 | 4.34936  | -8.68494 |
| H | -4.30373 | 1.89904  | -8.27203 |
| H | -3.79004 | 1.04555  | -6.01611 |
| H | -0.27257 | -3.88004 | -1.43127 |
| H | -0.58472 | -5.60732 | -3.16161 |
| H | 1.33411  | -6.33813 | -4.5639  |
| H | 3.57512  | -5.31744 | -4.21488 |
| H | 3.89098  | -3.59352 | -2.46755 |
| H | 0.68887  | -0.4692  | 1.19485  |
| H | -0.75368 | -0.85306 | 3.14814  |
| H | -1.31065 | -3.17208 | 3.86358  |
| H | -0.38483 | -5.09971 | 2.58906  |
| H | 1.04706  | -4.72088 | 0.62954  |
| H | 3.9215   | 3.20777  | -1.60958 |
| H | 4.96932  | 4.11743  | -3.6421  |
| H | 5.40544  | 2.64396  | -5.59885 |
| H | 4.80723  | 0.23156  | -5.47444 |



|   |         |          |          |
|---|---------|----------|----------|
| H | 3.77994 | -0.68797 | -3.42769 |
| H | 2.92673 | 1.1445   | 1.92638  |
| H | 1.6943  | 2.85721  | 3.22009  |
| H | 0.25623 | 4.50958  | 2.04134  |
| H | 0.07828 | 4.43749  | -0.44157 |
| H | 1.32232 | 2.76103  | -1.72661 |
| H | 2.42262 | -0.01644 | -4.38984 |

#### L4

|   |          |          |          |
|---|----------|----------|----------|
| C | -0.12724 | 2.54547  | 1.02098  |
| C | 0.5321   | 1.6655   | 2.09085  |
| C | 0.97168  | 0.31352  | 1.51936  |
| C | 1.92043  | 0.53207  | 0.32626  |
| C | 1.17089  | 1.27865  | -0.78791 |
| C | 0.77997  | 2.66056  | -0.21303 |
| N | 2.25809  | 2.46246  | 3.19188  |
| N | -0.46574 | -1.5767  | 1.11295  |
| P | 3.50447  | 1.43305  | 3.89199  |
| C | 4.91436  | 1.48008  | 2.69499  |
| C | 5.0951   | 2.52335  | 1.77742  |
| C | 6.27104  | 2.61311  | 1.02852  |
| C | 7.28379  | 1.66644  | 1.18597  |
| C | 7.11408  | 0.62063  | 2.09782  |
| C | 5.94378  | 0.53404  | 2.84856  |
| C | 2.8067   | -0.25847 | 3.57146  |
| C | 1.89796  | -0.76286 | 4.51605  |
| C | 1.23056  | -1.96828 | 4.29388  |
| C | 1.47847  | -2.70151 | 3.13113  |
| C | 2.40322  | -2.22786 | 2.19749  |
| C | 3.05893  | -1.01544 | 2.41464  |

|   |          |          |          |
|---|----------|----------|----------|
| P | 2.25501  | 4.00381  | 4.00702  |
| C | 1.88282  | 5.2835   | 2.71718  |
| C | 2.95402  | 6.10857  | 2.34016  |
| C | 2.77519  | 7.13905  | 1.41282  |
| C | 1.52415  | 7.34674  | 0.83328  |
| C | 0.44532  | 6.5385   | 1.20253  |
| C | 0.6224   | 5.52881  | 2.14526  |
| C | 0.71474  | 4.03515  | 5.0391   |
| C | 0.00847  | 5.22213  | 5.29311  |
| C | -1.04659 | 5.24498  | 6.20738  |
| C | -1.40909 | 4.08666  | 6.89479  |
| C | -0.69743 | 2.90561  | 6.6715   |
| C | 0.35769  | 2.88474  | 5.76188  |
| P | -0.62299 | -2.76116 | -0.17225 |
| C | 0.97158  | -3.71162 | -0.05081 |
| C | 2.20248  | -3.32146 | -0.60452 |
| C | 3.35614  | -4.07052 | -0.37508 |
| C | 3.30053  | -5.22445 | 0.40973  |
| C | 2.08165  | -5.63346 | 0.95382  |
| C | 0.92711  | -4.88558 | 0.71844  |
| C | -0.32667 | -1.74714 | -1.69457 |
| C | -0.69263 | -0.39314 | -1.7353  |
| C | -0.58967 | 0.34279  | -2.91661 |
| C | -0.1189  | -0.26346 | -4.08205 |
| C | 0.23266  | -1.61595 | -4.06194 |
| C | 0.1235   | -2.35196 | -2.88163 |
| P | -2.00061 | -1.34344 | 1.89726  |
| C | -1.63687 | -1.17383 | 3.69838  |
| C | -2.36126 | -0.31281 | 4.53989  |
| C | -2.20885 | -0.37092 | 5.92681  |

|   |          |          |          |
|---|----------|----------|----------|
| C | -1.32825 | -1.28524 | 6.50416  |
| C | -0.62221 | -2.16706 | 5.68102  |
| C | -0.79047 | -2.12387 | 4.29903  |
| C | -2.65235 | 0.32757  | 1.39974  |
| C | -3.63554 | 0.27354  | 0.39614  |
| C | -4.26282 | 1.43091  | -0.067   |
| C | -3.92741 | 2.66688  | 0.48406  |
| C | -2.9473  | 2.7399   | 1.47743  |
| C | -2.3112  | 1.58389  | 1.92861  |
| H | -0.31599 | 3.54397  | 1.42107  |
| H | -1.10257 | 2.13003  | 0.7521   |
| H | -0.15781 | 1.51607  | 2.92908  |
| H | 2.76267  | 1.1121   | 0.64106  |
| H | 1.81404  | 1.42306  | -1.65641 |
| H | 0.29275  | 0.71425  | -1.10579 |
| H | 1.6709   | 3.18639  | 0.0602   |
| H | 4.31982  | 3.27159  | 1.64832  |
| H | 6.38529  | 3.41928  | 0.31346  |
| H | 8.19633  | 1.7401   | 0.60158  |
| H | 7.89379  | -0.12514 | 2.22532  |
| H | 5.82548  | -0.28148 | 3.55789  |
| H | 1.70895  | -0.20679 | 5.4307   |
| H | 0.52278  | -2.33743 | 5.03055  |
| H | 0.96087  | -3.64111 | 2.95913  |
| H | 2.61336  | -2.78683 | 1.29023  |
| H | 3.74911  | -0.65043 | 1.66414  |
| H | 3.93106  | 5.94755  | 2.78791  |
| H | 3.61287  | 7.77555  | 1.14273  |
| H | 1.38586  | 8.13288  | 0.09713  |
| H | -0.52665 | 6.68555  | 0.74351  |

|   |          |          |          |
|---|----------|----------|----------|
| H | -0.22992 | 4.93112  | 2.44494  |
| H | 0.27417  | 6.1359   | 4.77125  |
| H | -1.58752 | 6.17164  | 6.37836  |
| H | -2.23256 | 4.10442  | 7.60267  |
| H | -0.96378 | 1.99901  | 7.20787  |
| H | 0.90611  | 1.96324  | 5.59845  |
| H | 2.26926  | -2.42409 | -1.21097 |
| H | 4.30025  | -3.74429 | -0.80267 |
| H | 4.20084  | -5.80436 | 0.59144  |
| H | 2.02904  | -6.53553 | 1.55669  |
| H | -0.02042 | -5.20979 | 1.14181  |
| H | -1.06098 | 0.09472  | -0.84098 |
| H | -0.86391 | 1.39156  | -2.9172  |
| H | -0.02795 | 0.3134   | -4.99775 |
| H | 0.59281  | -2.09976 | -4.96588 |
| H | 0.40662  | -3.40101 | -2.88105 |
| H | -3.05201 | 0.40827  | 4.11824  |
| H | -2.77785 | 0.30903  | 6.55526  |
| H | -1.20512 | -1.32391 | 7.58254  |
| H | 0.05157  | -2.89906 | 6.11742  |
| H | -0.26138 | -2.83606 | 3.67472  |
| H | -3.91463 | -0.69128 | -0.01906 |
| H | -5.01923 | 1.36363  | -0.84338 |
| H | -4.42488 | 3.57076  | 0.14298  |
| H | -2.6717  | 3.69863  | 1.90291  |
| H | -1.56217 | 1.66757  | 2.70614  |
| H | 1.46737  | -0.28131 | 2.28981  |
| H | 0.26694  | 3.21741  | -0.96908 |
| H | 2.25615  | -0.41501 | -0.04147 |

**L5**

|          |                 |                 |                 |
|----------|-----------------|-----------------|-----------------|
| <b>C</b> | <b>-1.22819</b> | <b>0.94711</b>  | <b>2.11411</b>  |
| <b>C</b> | <b>-0.10511</b> | <b>0.3912</b>   | <b>2.99918</b>  |
| <b>C</b> | <b>0.44683</b>  | <b>-0.9287</b>  | <b>2.45063</b>  |
| <b>C</b> | <b>0.9341</b>   | <b>-0.73205</b> | <b>1.00313</b>  |
| <b>C</b> | <b>-0.2552</b>  | <b>-0.32944</b> | <b>0.11768</b>  |
| <b>C</b> | <b>-0.76775</b> | <b>1.02913</b>  | <b>0.65112</b>  |
| <b>N</b> | <b>-1.71101</b> | <b>1.75633</b>  | <b>-0.24106</b> |
| <b>N</b> | <b>1.8136</b>   | <b>-1.83589</b> | <b>0.51418</b>  |
| <b>P</b> | <b>-1.22704</b> | <b>3.23526</b>  | <b>-1.06679</b> |
| <b>C</b> | <b>-0.34093</b> | <b>2.68163</b>  | <b>-2.5936</b>  |
| <b>C</b> | <b>-0.5339</b>  | <b>1.41724</b>  | <b>-3.16552</b> |
| <b>C</b> | <b>0.00806</b>  | <b>1.11507</b>  | <b>-4.41721</b> |
| <b>C</b> | <b>0.7469</b>   | <b>2.06949</b>  | <b>-5.11708</b> |
| <b>C</b> | <b>0.94671</b>  | <b>3.33404</b>  | <b>-4.55584</b> |
| <b>C</b> | <b>0.40181</b>  | <b>3.63727</b>  | <b>-3.31011</b> |
| <b>C</b> | <b>0.18845</b>  | <b>3.8021</b>   | <b>-0.00568</b> |
| <b>C</b> | <b>-0.13062</b> | <b>4.5706</b>   | <b>1.12572</b>  |
| <b>C</b> | <b>0.85464</b>  | <b>4.93304</b>  | <b>2.04535</b>  |
| <b>C</b> | <b>2.18176</b>  | <b>4.55084</b>  | <b>1.83622</b>  |
| <b>C</b> | <b>2.51919</b>  | <b>3.81318</b>  | <b>0.69904</b>  |
| <b>C</b> | <b>1.53043</b>  | <b>3.43961</b>  | <b>-0.21194</b> |
| <b>P</b> | <b>-3.40635</b> | <b>1.46339</b>  | <b>-0.52433</b> |
| <b>C</b> | <b>-3.60663</b> | <b>-0.37373</b> | <b>-0.68136</b> |
| <b>C</b> | <b>-3.87447</b> | <b>-0.85663</b> | <b>-1.97187</b> |
| <b>C</b> | <b>-4.09264</b> | <b>-2.21861</b> | <b>-2.19827</b> |
| <b>C</b> | <b>-4.02625</b> | <b>-3.1215</b>  | <b>-1.13786</b> |
| <b>C</b> | <b>-3.7672</b>  | <b>-2.65653</b> | <b>0.1545</b>   |
| <b>C</b> | <b>-3.57489</b> | <b>-1.29563</b> | <b>0.37931</b>  |
| <b>C</b> | <b>-4.26244</b> | <b>1.81001</b>  | <b>1.08365</b>  |

|   |          |          |          |
|---|----------|----------|----------|
| C | -5.41113 | 1.1093   | 1.48583  |
| C | -6.13033 | 1.50335  | 2.61589  |
| C | -5.72407 | 2.61157  | 3.35918  |
| C | -4.5988  | 3.33357  | 2.9546   |
| C | -3.88407 | 2.9419   | 1.82461  |
| P | 3.5498   | -1.59437 | 0.596    |
| C | 3.78065  | -0.84915 | 2.28482  |
| C | 3.60887  | 0.50609  | 2.6131   |
| C | 3.72308  | 0.93911  | 3.93375  |
| C | 4.01348  | 0.02635  | 4.95017  |
| C | 4.20233  | -1.32105 | 4.63737  |
| C | 4.09316  | -1.75156 | 3.31434  |
| C | 3.80361  | -0.11573 | -0.49153 |
| C | 2.96247  | 0.11781  | -1.59009 |
| C | 3.22334  | 1.15586  | -2.4857  |
| C | 4.33348  | 1.98068  | -2.29953 |
| C | 5.19072  | 1.74962  | -1.22019 |
| C | 4.93196  | 0.70767  | -0.32903 |
| P | 1.45928  | -3.33045 | -0.30198 |
| C | 0.03986  | -4.08627 | 0.60306  |
| C | -0.97338 | -4.81122 | -0.04657 |
| C | -1.90567 | -5.55124 | 0.68374  |
| C | -1.85055 | -5.58101 | 2.07689  |
| C | -0.83108 | -4.88756 | 2.73526  |
| C | 0.11185  | -4.16713 | 2.00593  |
| C | 0.76847  | -2.919   | -1.98068 |
| C | 1.70413  | -3.04658 | -3.02235 |
| C | 1.34495  | -2.81752 | -4.35127 |
| C | 0.03027  | -2.47341 | -4.66268 |
| C | -0.91109 | -2.33529 | -3.63921 |

|   |          |          |          |
|---|----------|----------|----------|
| C | -0.54673 | -2.55036 | -2.31048 |
| H | -2.1179  | 0.31827  | 2.20954  |
| H | 0.71049  | 1.12474  | 3.05433  |
| H | -0.4701  | 0.25265  | 4.02315  |
| H | -0.33984 | -1.6899  | 2.46541  |
| H | 1.58898  | 0.14475  | 1.00607  |
| H | 0.05871  | -0.20942 | -0.91956 |
| H | -1.03474 | -1.09232 | 0.15038  |
| H | 0.12065  | 1.66023  | 0.67575  |
| H | -1.11204 | 0.66619  | -2.63707 |
| H | -0.14014 | 0.12655  | -4.83571 |
| H | 1.16646  | 1.83017  | -6.08989 |
| H | 1.52447  | 4.08362  | -5.0894  |
| H | 0.56032  | 4.62586  | -2.88611 |
| H | -1.15807 | 4.88512  | 1.28986  |
| H | 0.58741  | 5.51833  | 2.92053  |
| H | 2.94931  | 4.83497  | 2.55071  |
| H | 3.54658  | 3.51173  | 0.5165   |
| H | 1.8076   | 2.84149  | -1.07117 |
| H | -3.92413 | -0.15587 | -2.80103 |
| H | -4.31116 | -2.57229 | -3.20173 |
| H | -4.17467 | -4.18283 | -1.3128  |
| H | -3.69913 | -3.35621 | 0.98085  |
| H | -3.40648 | -0.9464  | 1.39082  |
| H | -5.74692 | 0.24506  | 0.9217   |
| H | -7.00855 | 0.93841  | 2.91608  |
| H | -6.28171 | 2.91483  | 4.24041  |
| H | -4.27778 | 4.20441  | 3.51953  |
| H | -3.01373 | 3.51156  | 1.517    |
| H | 3.37519  | 1.23057  | 1.83976  |

|   |          |          |          |
|---|----------|----------|----------|
| H | 3.57436  | 1.98974  | 4.16754  |
| H | 4.09755  | 0.3643   | 5.97905  |
| H | 4.43858  | -2.03481 | 5.42139  |
| H | 4.24408  | -2.80143 | 3.07523  |
| H | 2.09627  | -0.51234 | -1.75167 |
| H | 2.5488   | 1.32487  | -3.3173  |
| H | 4.52873  | 2.79559  | -2.99043 |
| H | 6.06241  | 2.38102  | -1.07062 |
| H | 5.60473  | 0.54497  | 0.50857  |
| H | -1.04049 | -4.80518 | -1.1284  |
| H | -2.68207 | -6.09994 | 0.15727  |
| H | -2.58103 | -6.1508  | 2.64372  |
| H | -0.76253 | -4.91847 | 3.81905  |
| H | 0.91691  | -3.66095 | 2.52801  |
| H | 2.72409  | -3.3366  | -2.78418 |
| H | 2.08573  | -2.92211 | -5.13853 |
| H | -0.26251 | -2.31232 | -5.69668 |
| H | -1.93297 | -2.05606 | -3.8715  |
| H | -1.29814 | -2.44605 | -1.53776 |
| H | 1.26614  | -1.28747 | 3.07765  |
| C | -1.63379 | 2.35262  | 2.59539  |
| H | -1.94176 | 2.94167  | 1.7569   |
| H | -2.44288 | 2.27176  | 3.29091  |
| H | -0.79854 | 2.82098  | 3.07278  |



## Reference

1. Dolomanov, O.V., Bourhis, L.J., Gildea, R.J, Howard, J.A.K. & Puschmann, H. (2009), *J. Appl. Cryst.* 42, 339-341.
2. Sheldrick, G.M. (2015). *Acta Cryst.* A71, 3-8.
3. Sheldrick, G.M. (2015). *Acta Cryst.* C71, 3-8.
4. Gaussian 09, Revision E.01, M. J. Frisch, G. W. Trucks, H. B. Schlegel, G. E. Scuseria, M. A. Robb, J. R. Cheeseman, G. Scalmani, V. Barone, B. Mennucci, G. A. Petersson, H. Nakatsuji, M. Caricato, X. Li, H. P. Hratchian, A. F. Izmaylov, J. Bloino, G. Zheng, J. L. Sonnenberg, M. Hada, M. Ehara, K. Toyota, R. Fukuda, J. Hasegawa, M. Ishida, T. Nakajima, Y. Honda, O. Kitao, H. Nakai, T. Vreven, J. A. Montgomery, Jr., J. E. Peralta, F. Ogliaro, M. Bearpark, J. J. Heyd, E. Brothers, K. N. Kudin, V. N. Staroverov, T. Keith, R. Kobayashi, J. Normand, K. Raghavachari, A. Rendell, J. C. Burant, S. S. Iyengar, J. Tomasi, M. Cossi, N. Rega, J. M. Millam, M. Klene, J. E. Knox, J. B. Cross, V. Bakken, C. Adamo, J. Jaramillo, R. Gomperts, R. E. Stratmann, O. Yazyev, A. J. Austin, R. Cammi, C. Pomelli, J. W. Ochterski, R. L. Martin, K. Morokuma, V. G. Zakrzewski, G. A. Voth, P. Salvador, J. J. Dannenberg, S. Dapprich, A. D. Daniels, O. Farkas, J. B. Foresman, J. V. Ortiz, J. Cioslowski, and D. J. Fox, Gaussian, Inc., Wallingford CT, **2013**.
